# Supplementary material for: Chloroquine-Induced DNA Damage Synergizes with Nonhomologous End Joining Inhibition to Cause Ovarian Cancer Cell Cytotoxicity
Source: MDPI journal article supplement (doi:10.3390/ijms23147518), 2022-07-07
Supplement: s1 [file s1]

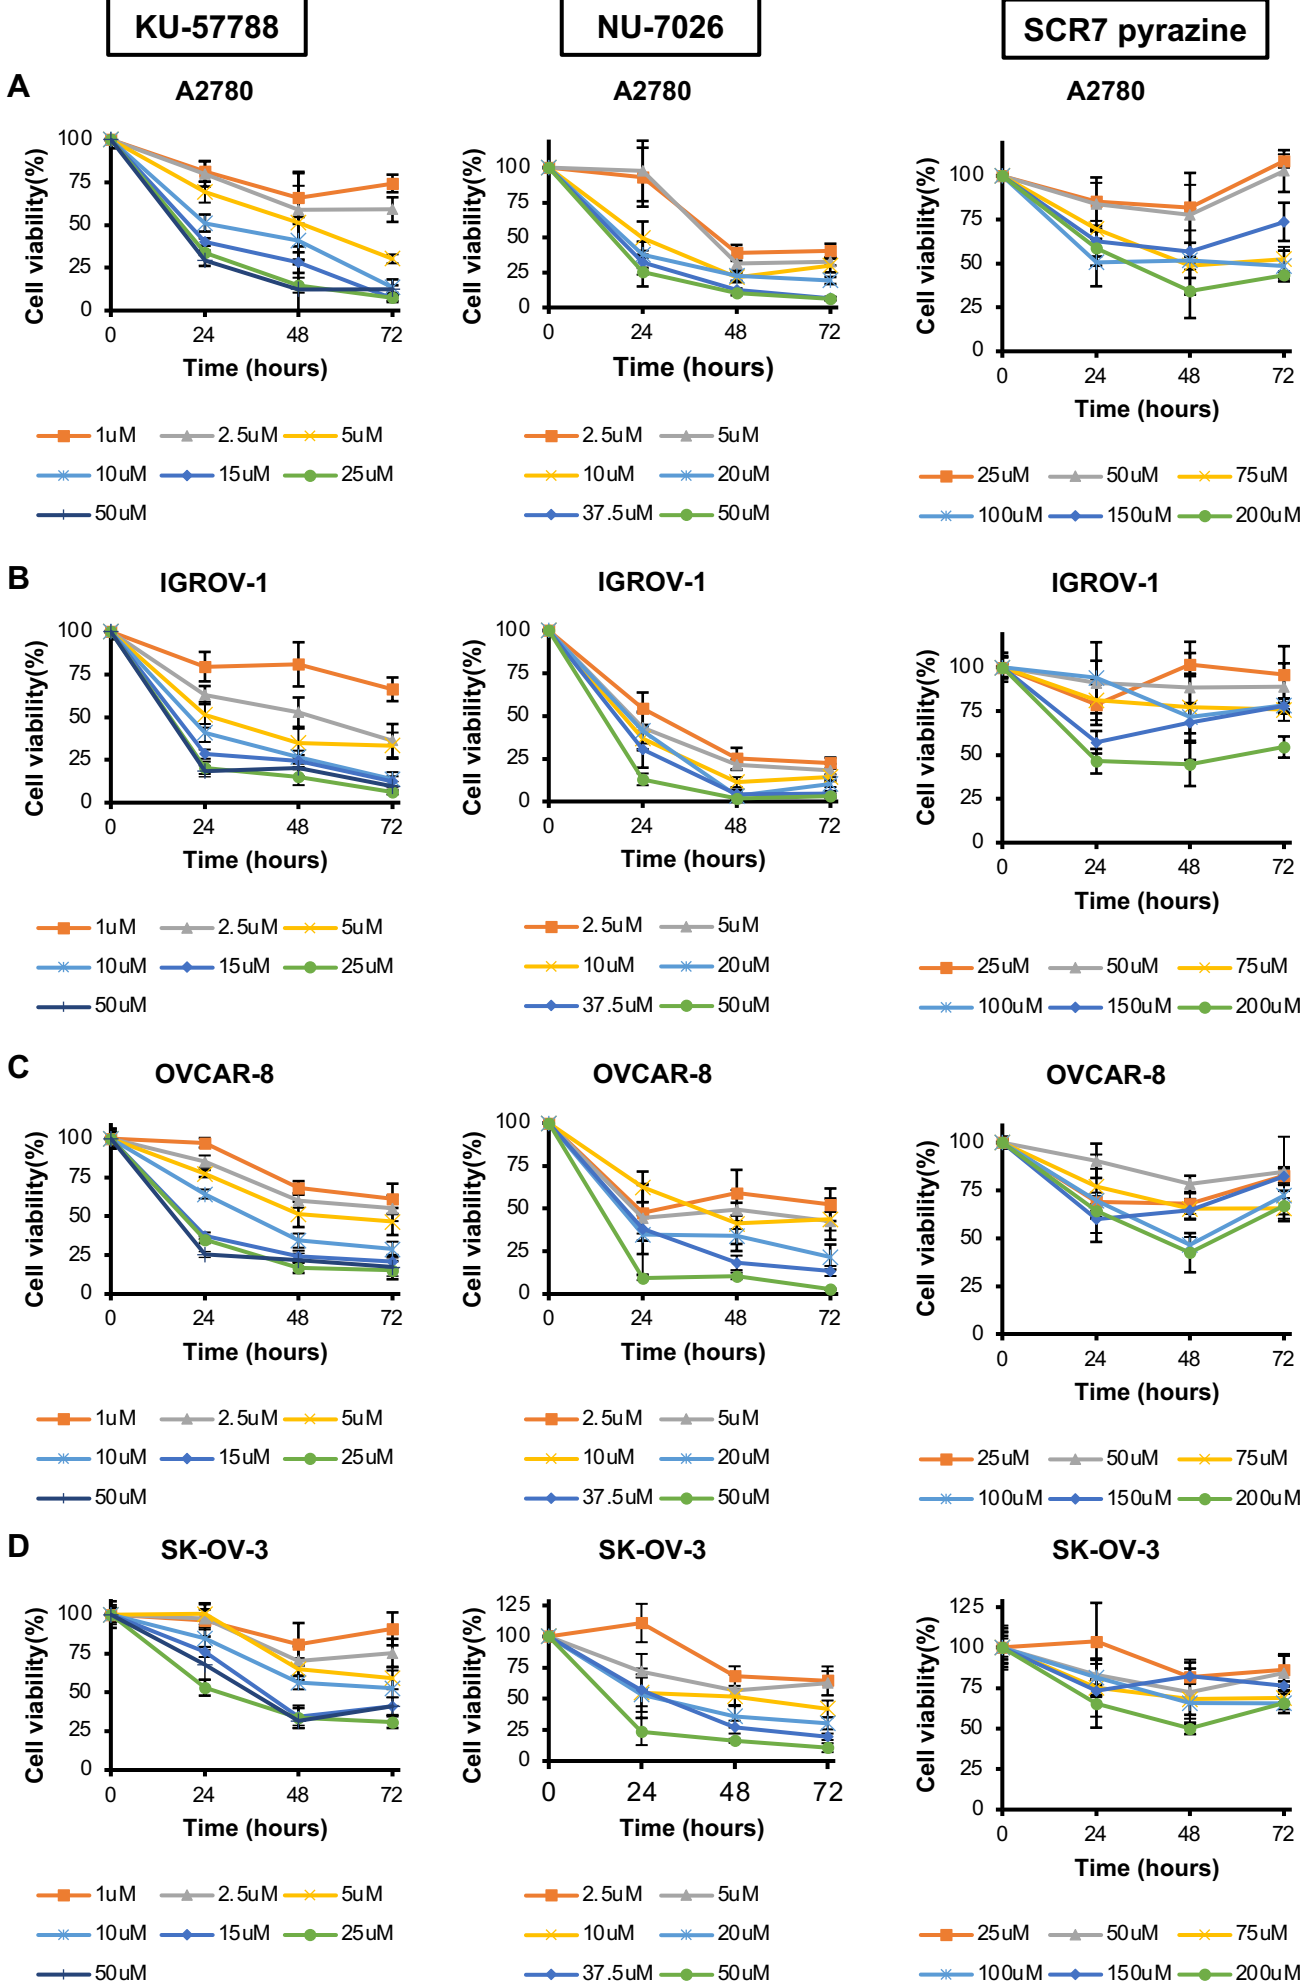

**Figure S1. Effect of NHEJi on OCCLs proliferation.** Cell proliferation after treatment with the indicated doses of KU-57788, NU-7026 or SCR7 pyrazine for 24, 48 and 72 h of (A) A2780, (B) IGROV-1, (C) OVCAR-8 and (D) SK-OV-3 cell lines.

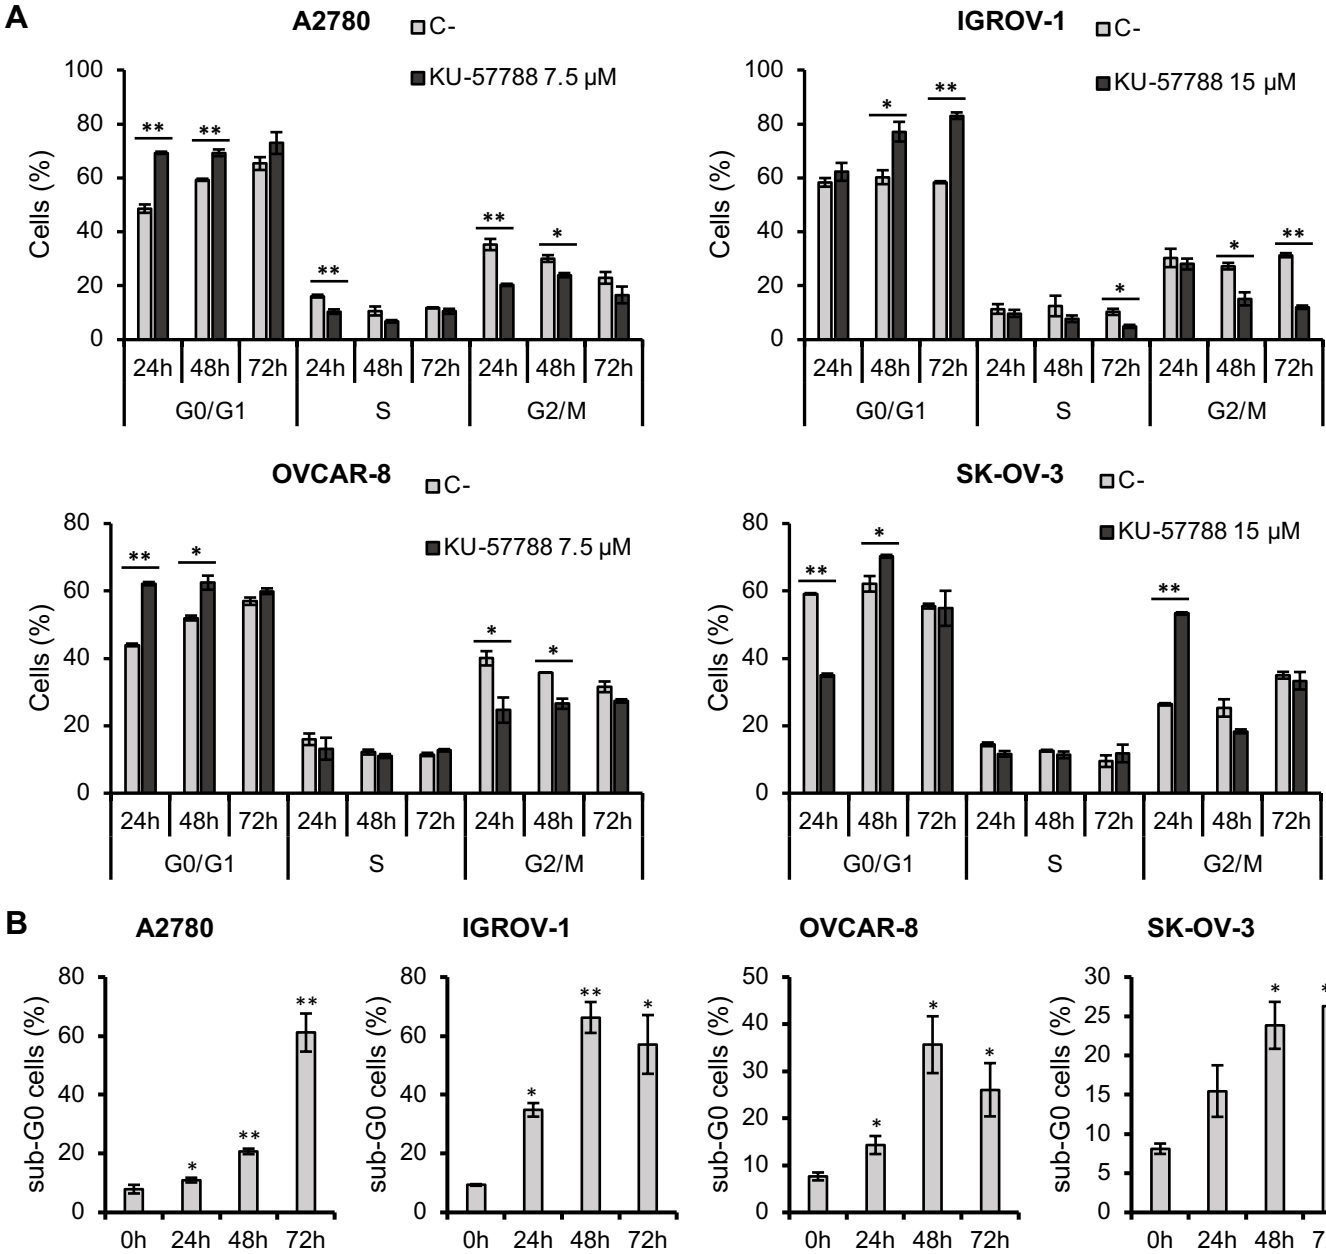

**Figure S2. Effect of KU-57788 on cell cycle distribution in OCCLs.** Cell cycle distribution of live OCCLs (excluding the sub-G0 population) after treatment with the indicated doses of KU-57788 for 24, 48 and 72 h. Data are the mean of three independent experiments. Error bars represent the SD (\*\*p < 0.01, \*p < 0.05). (B) Percentage of death cells after 24,48 or 72 h of treatment with KU-57788.

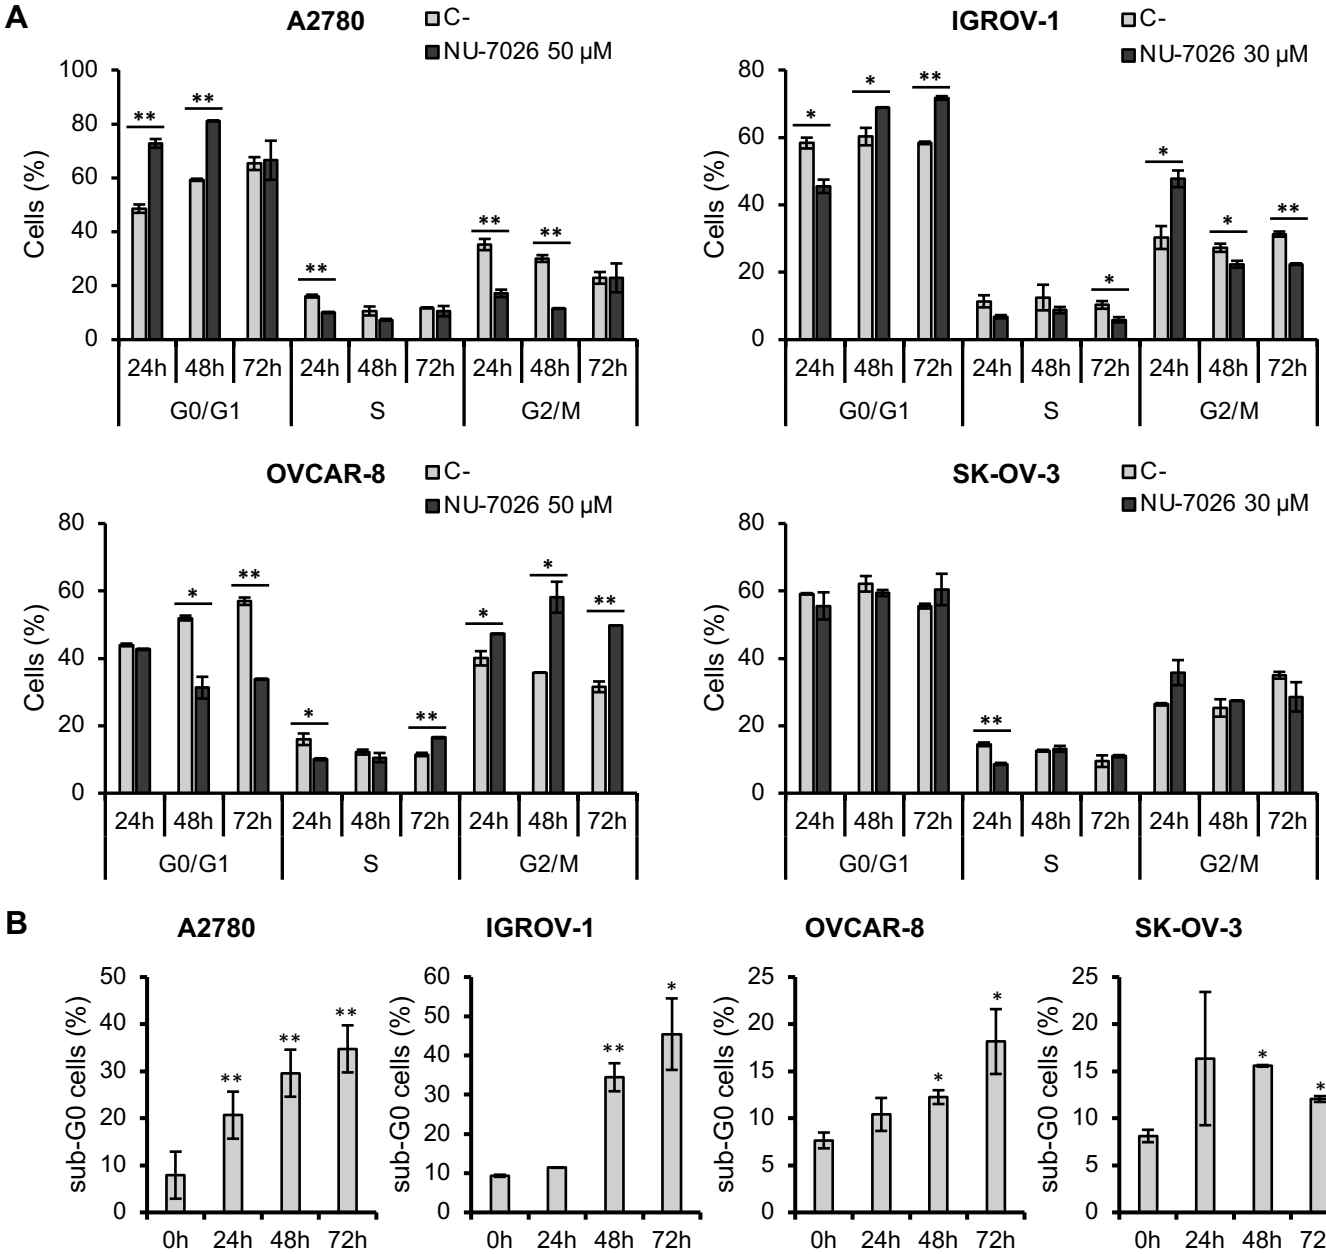

**Figure S3. Effect of NU-7026 on cell cycle distribution in OCCLs.** Cell cycle distribution of live OCCLs (excluding the sub-G0 population) after treatment with the indicated doses of NU-7026 for 24, 48 and 72 h. Data are the mean of three independent experiments. Error bars represent the SD (\*\*p < 0.01, \*p < 0.05). (B) Percentage of death cells after 24,48 or 72 h of treatment with NU-7026.

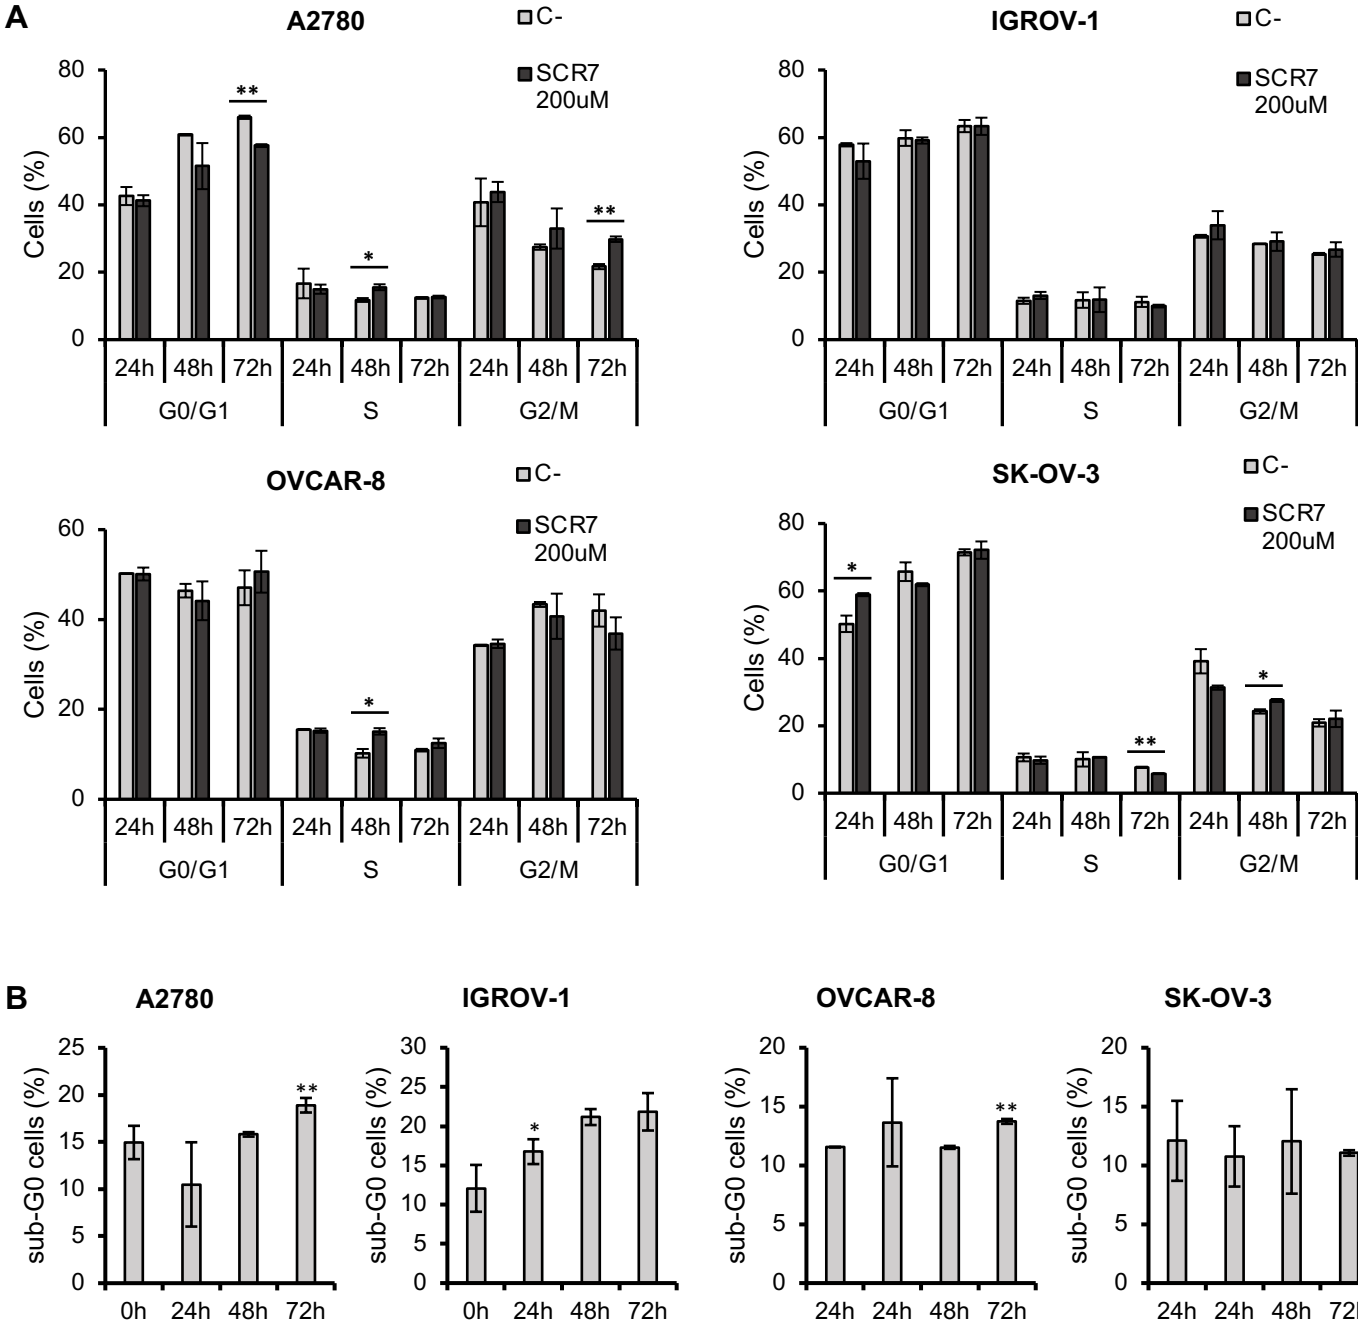

**Figure S4. Effect of SCR7 pyrazine on cell cycle distribution in OCCLs.** (A) Cell cycle distribution of live OCCLs (excluding the sub-G0 population) after treatment with the indicated doses of SCR7 for 24, 48 and 72 h. Data are the mean of three independent experiments. Error bars represent the SD (\*\*p < 0.01, \*p < 0.05). (B) Percentage of death cells after 24, 48 or 72 h of treatment with SCR7.

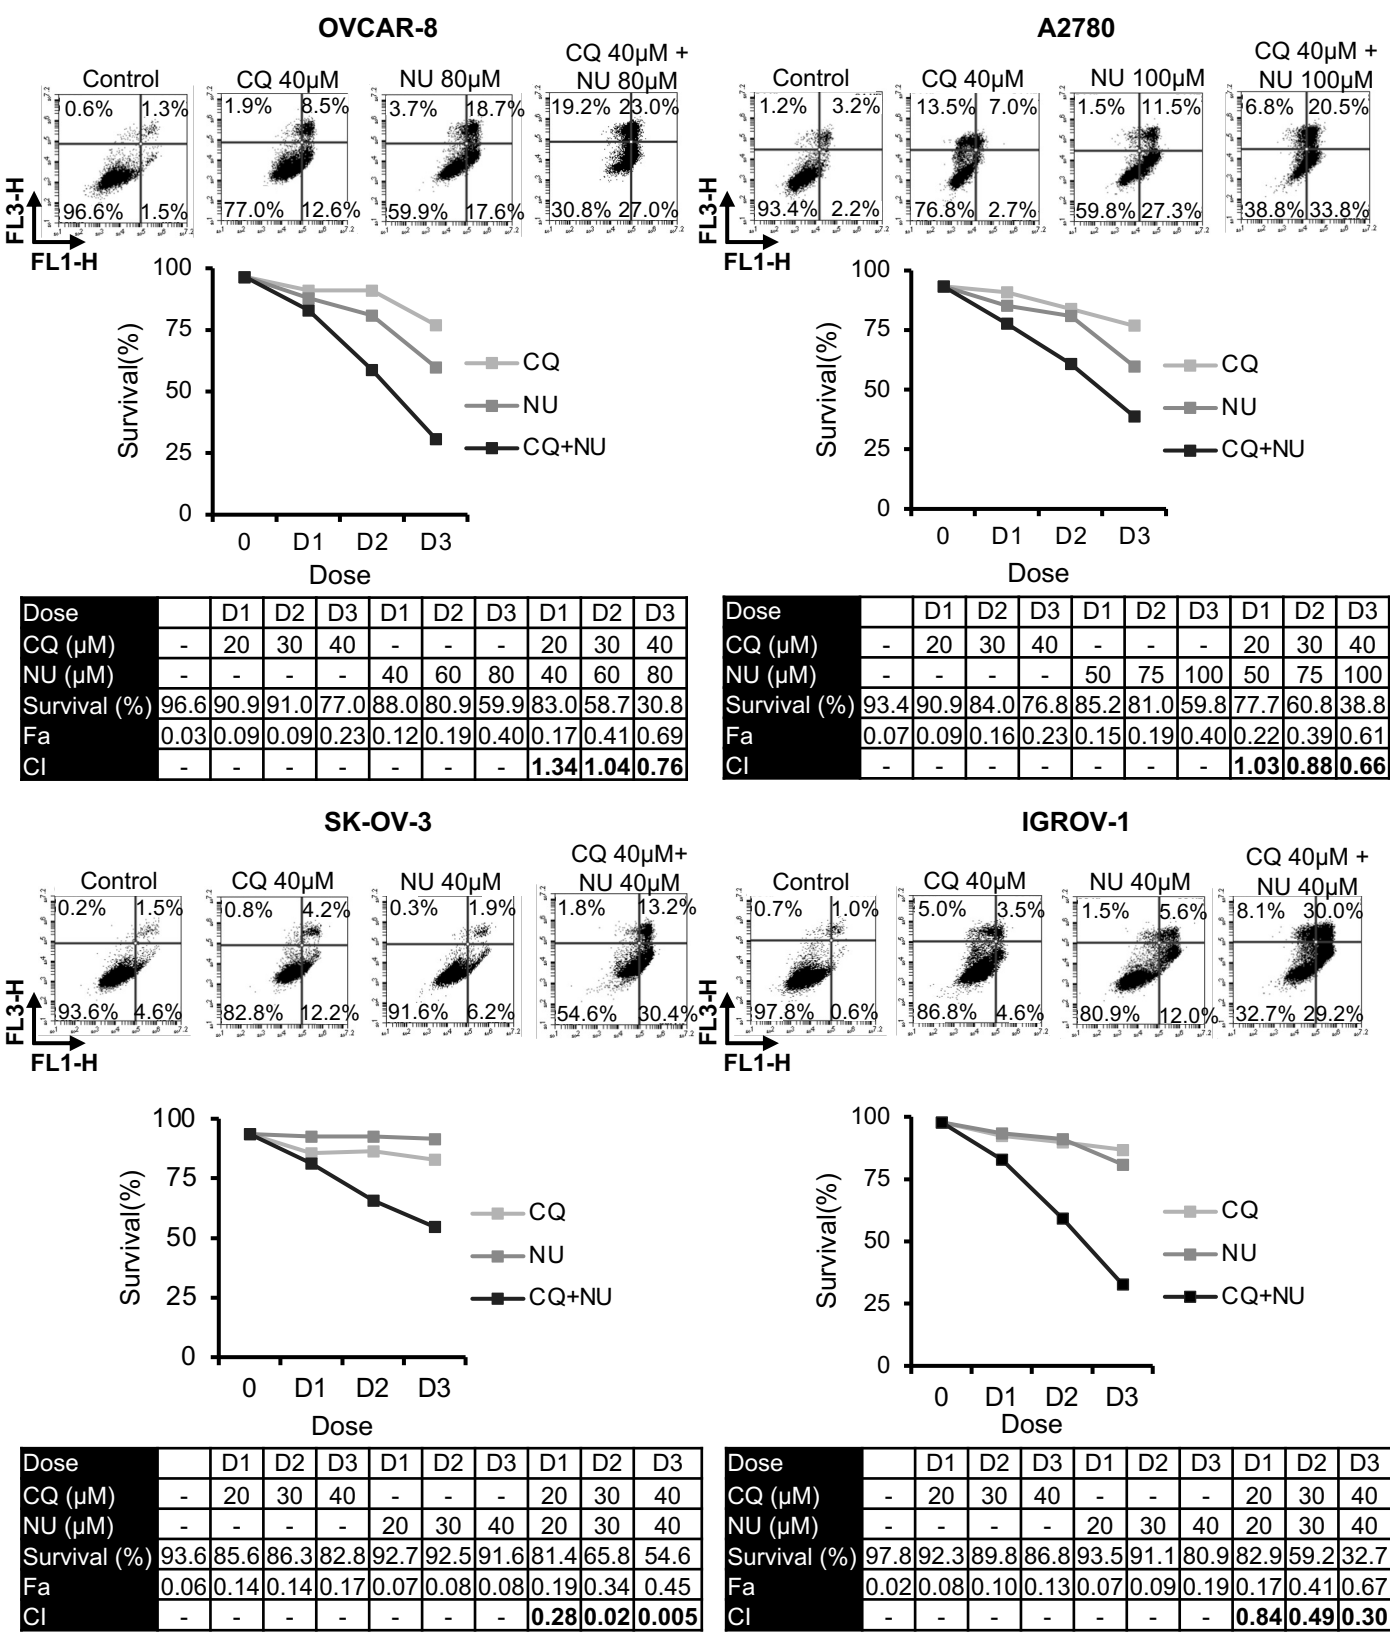

**Figure S5. Synergistic effect of chloroquine and NU-7026 in OCCLs.** Cells were exposed for 72 h to the indicated concentrations of NU and CQ at a constant ratio and the percentage of apoptotic cells were assessed by flow cytometry (after cell staining with annexin V and propidium iodide). CI values, calculated using Compusyn Software, are shown.

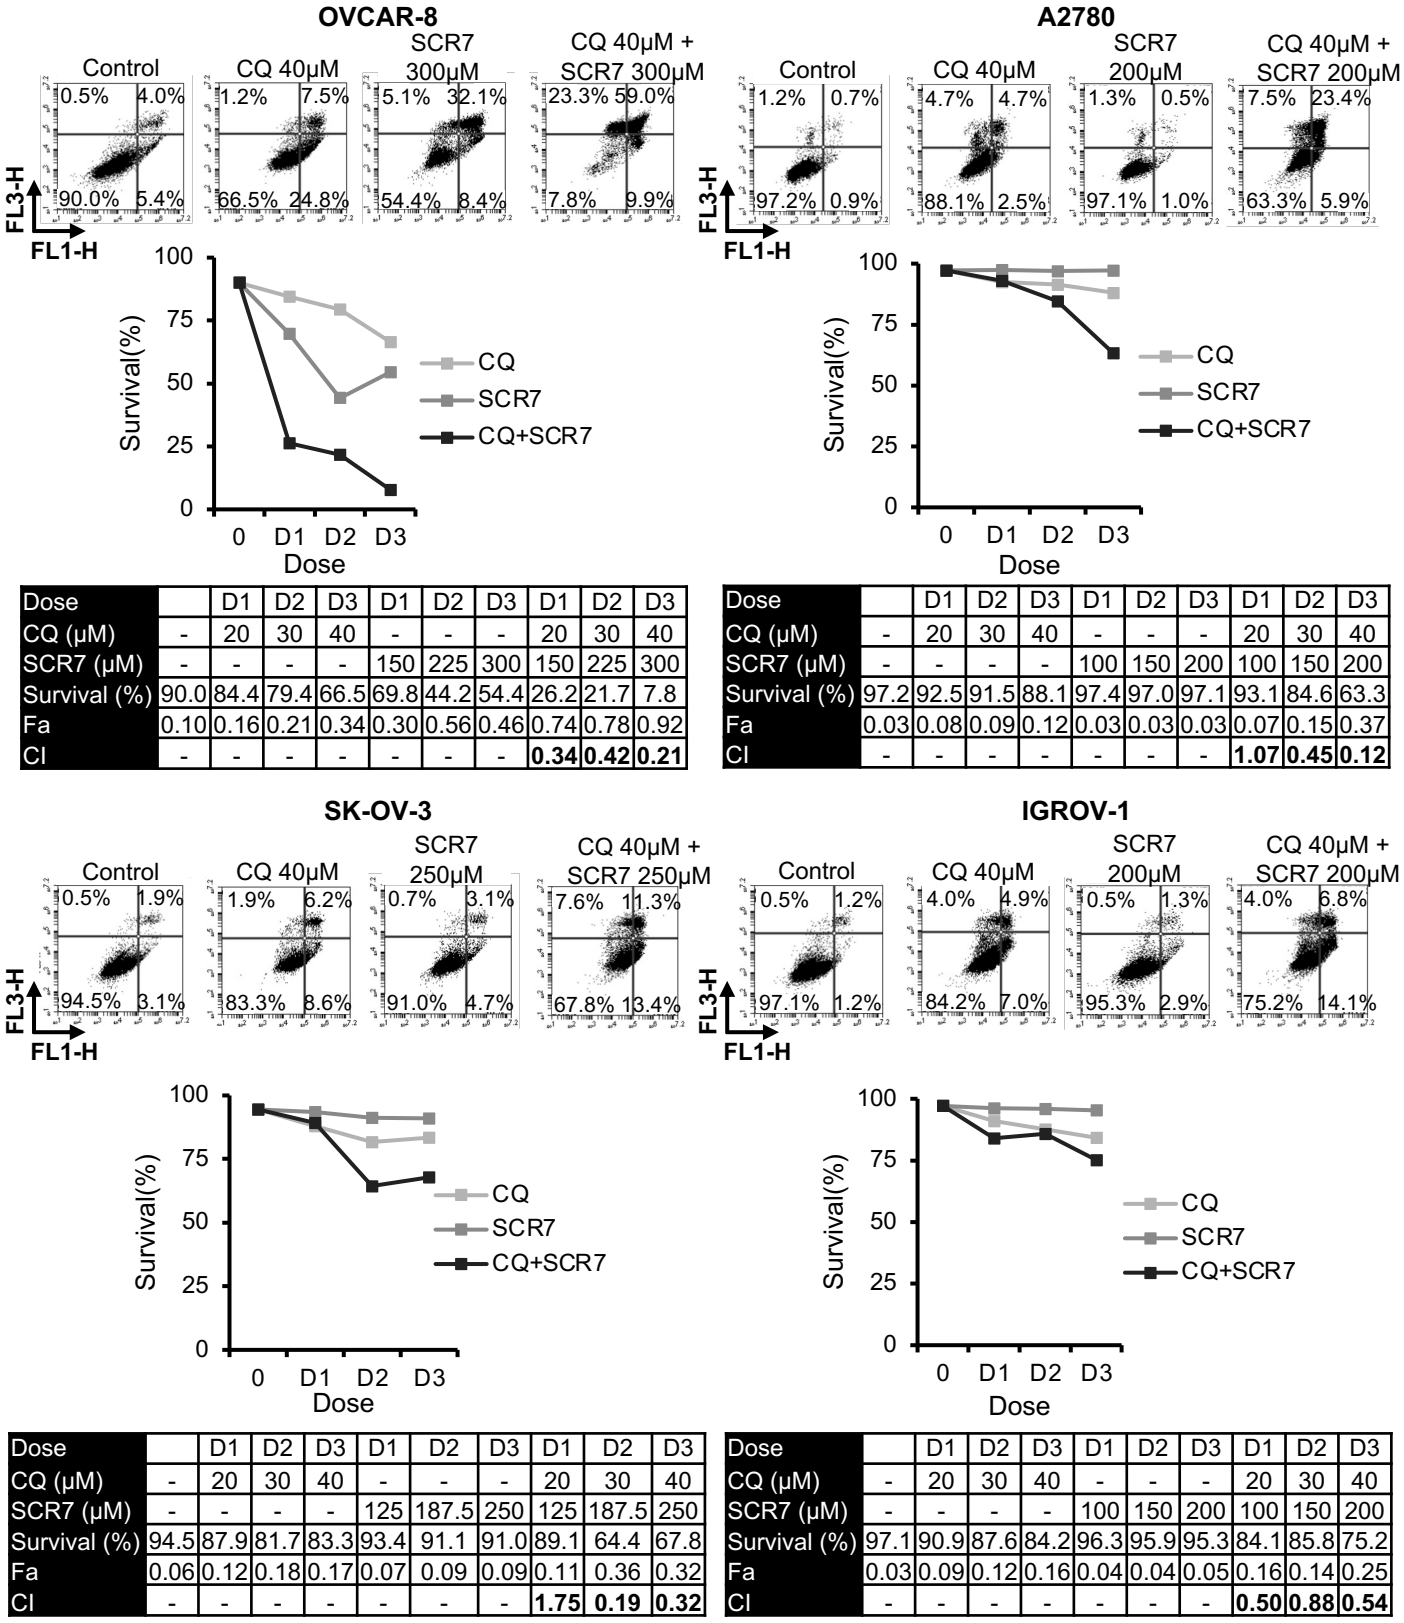

SK-OV-3

Control

CQ 40μM

SCR7 250μM

CQ 40μM + SCR7 250μM

0.5% 1.9%

1.9% 6.2%

0.7% 3.1%

7.6% 11.3%

94.5% 3.1%

83.3% 8.6%

91.0% 4.7%

67.8% 13.4%

FL3-H

FL1-H

Survival(%)

Dose

CQ

SCR7

CQ+SCR7

|              |      |      |      |      |      |       |      |      |       |      |
|--------------|------|------|------|------|------|-------|------|------|-------|------|
| Dose         |      | D1   | D2   | D3   | D1   | D2    | D3   | D1   | D2    | D3   |
| CQ (μM)      | -    | 20   | 30   | 40   | -    | -     | -    | 20   | 30    | 40   |
| SCR7 (μM)    | -    | -    | -    | -    | 125  | 187.5 | 250  | 125  | 187.5 | 250  |
| Survival (%) | 94.5 | 87.9 | 81.7 | 83.3 | 93.4 | 91.1  | 91.0 | 89.1 | 64.4  | 67.8 |
| Fa           | 0.06 | 0.12 | 0.18 | 0.17 | 0.07 | 0.09  | 0.09 | 0.11 | 0.36  | 0.32 |
| CI           | -    | -    | -    | -    | -    | -     | -    | 1.75 | 0.19  | 0.32 |

IGROV-1

Control

CQ 40μM

SCR7 200μM

CQ 40μM + SCR7 200μM

0.5% 1.2%

4.0% 4.9%

0.5% 1.3%

4.0% 6.8%

97.1% 1.2%

84.2% 7.0%

95.3% 2.9%

75.2% 14.1%

FL3-H

FL1-H

Survival(%)

Dose

CQ

SCR7

CQ+SCR7

|              |      |      |      |      |      |      |      |      |      |      |
|--------------|------|------|------|------|------|------|------|------|------|------|
| Dose         |      | D1   | D2   | D3   | D1   | D2   | D3   | D1   | D2   | D3   |
| CQ (μM)      | -    | 20   | 30   | 40   | -    | -    | -    | 20   | 30   | 40   |
| SCR7 (μM)    | -    | -    | -    | -    | 100  | 150  | 200  | 100  | 150  | 200  |
| Survival (%) | 97.1 | 90.9 | 87.6 | 84.2 | 96.3 | 95.9 | 95.3 | 84.1 | 85.8 | 75.2 |
| Fa           | 0.03 | 0.09 | 0.12 | 0.16 | 0.04 | 0.04 | 0.05 | 0.16 | 0.14 | 0.25 |
| CI           | -    | -    | -    | -    | -    | -    | -    | 0.50 | 0.88 | 0.54 |

**Figure S6. Synergistic effect of chloroquine and SCR7 pyrazine in OCCLs.** Cells were exposed for 72 h to the indicated concentrations of SCR7 and CQ at a constant ratio and the percentage of apoptotic cells were assessed by flow cytometry (after cell staining with annexin V and propidium iodide). CI values, calculated using Compusyn Software, are shown.

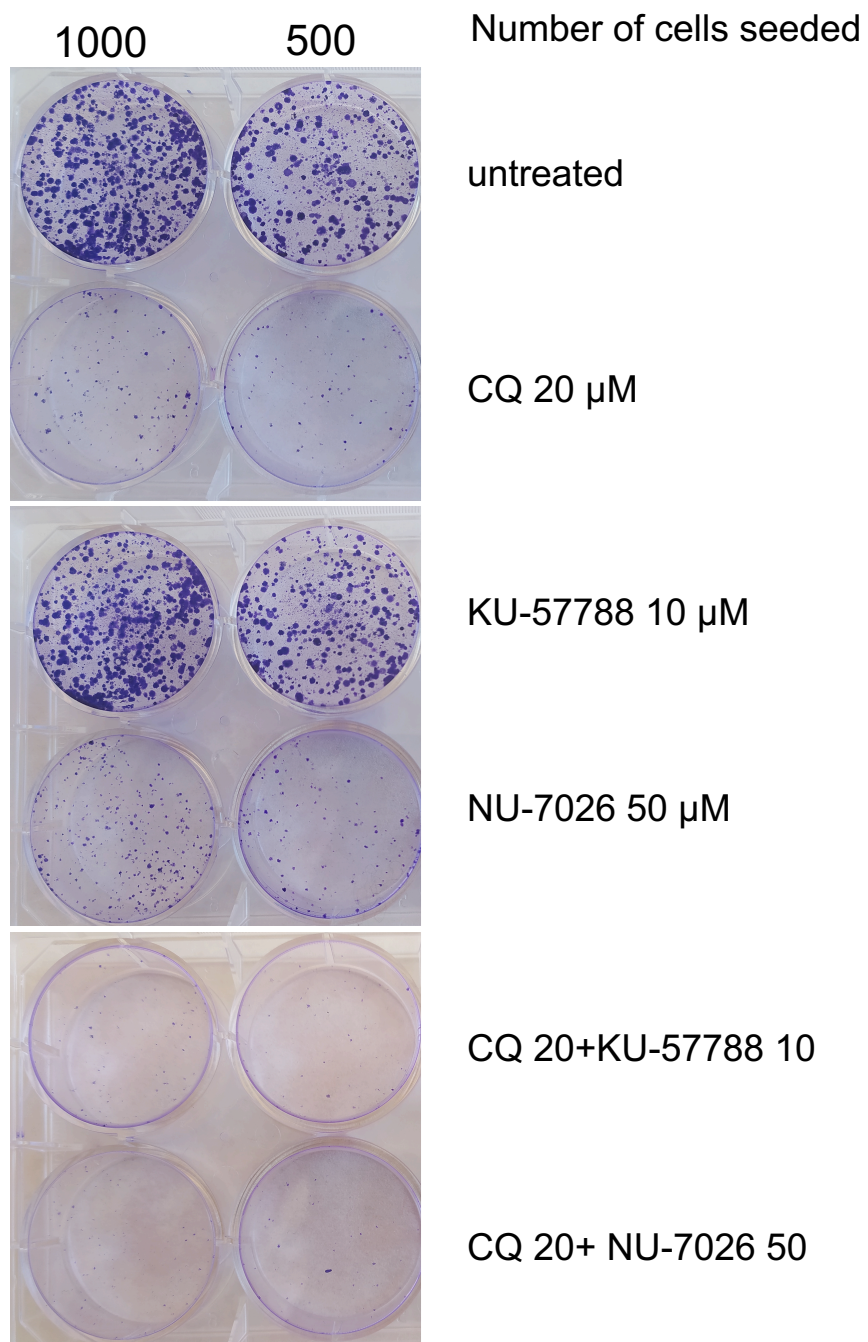

**Figure S7. Clonogenic assays.** A2780 cells were seeded in 6 well plates and 24 h later they were incubated in the presence of the indicated compounds for 72 hours. Cells were then washed with PBS and incubated in complete RPMI1640 medium for 5 days. Colonies were fixed with 4% paraformaldehyde and stained with crystal violet.
